# Supplementary material for: Growth behavior and influence factors of three-dimensional hierarchical flower-like FeF3·0.33H2O
Source: Royal Society of Chemistry journal article supplement (doi:10.1039/d0ce00771d), 2020-01-01
Supplement: d0ce00771d1.pdf [file d0ce00771d1.pdf]

# Growth behavior and influence factors of three-dimensional hierarchical flower-like $\text{FeF}_3 \cdot 0.33\text{H}_2\text{O}$

Shuyi Chen, Qing Shi, Jinfang Lin, Zijian Cai, Linshen Cao, Licai Zhu,\* and Zhongzhi Yuan\*

*School of Chemistry, South China Normal University, Guangzhou 510006, China*

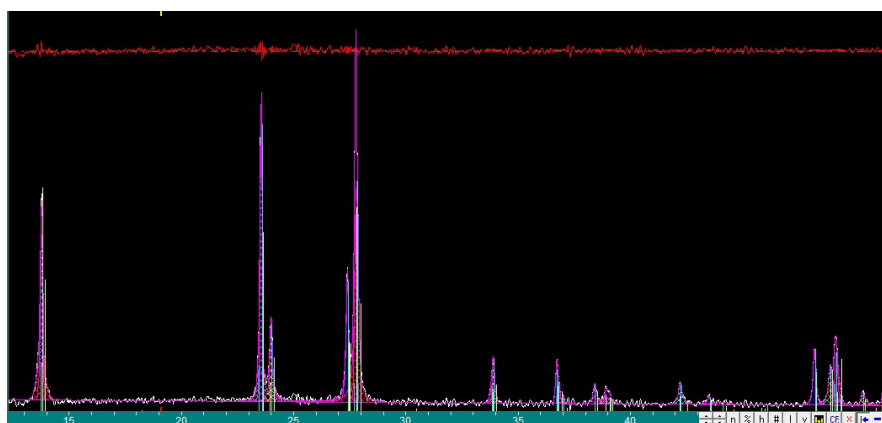

Fig. S1 The calculated value of the crystallinity of the sample with a water-alcohol ratio of 0:1 is 84.26%.

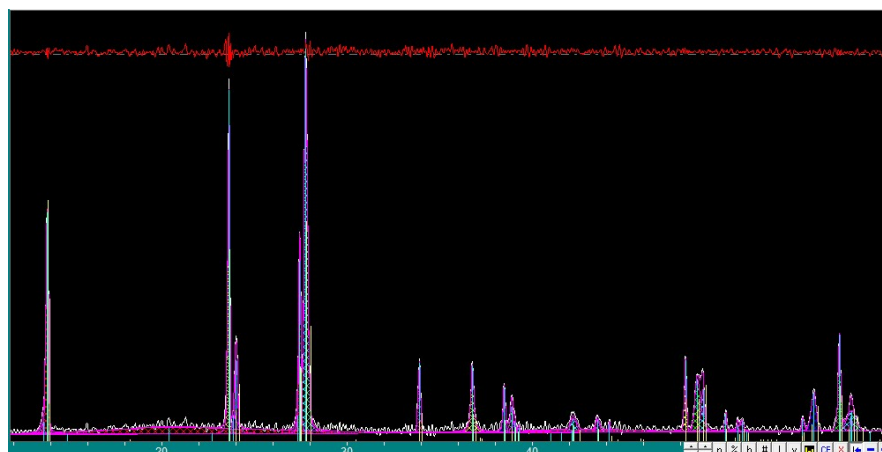

Fig. S2 The calculated value of the crystallinity of the sample with a water-alcohol ratio of 1: 7 is 61.05%.

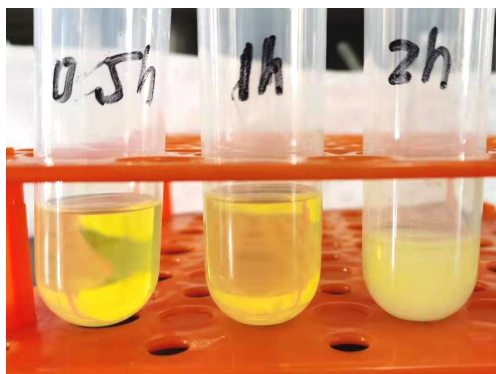

Fig. S3 A image of the undried sample obtained with a reaction time of 0.5-2 h.

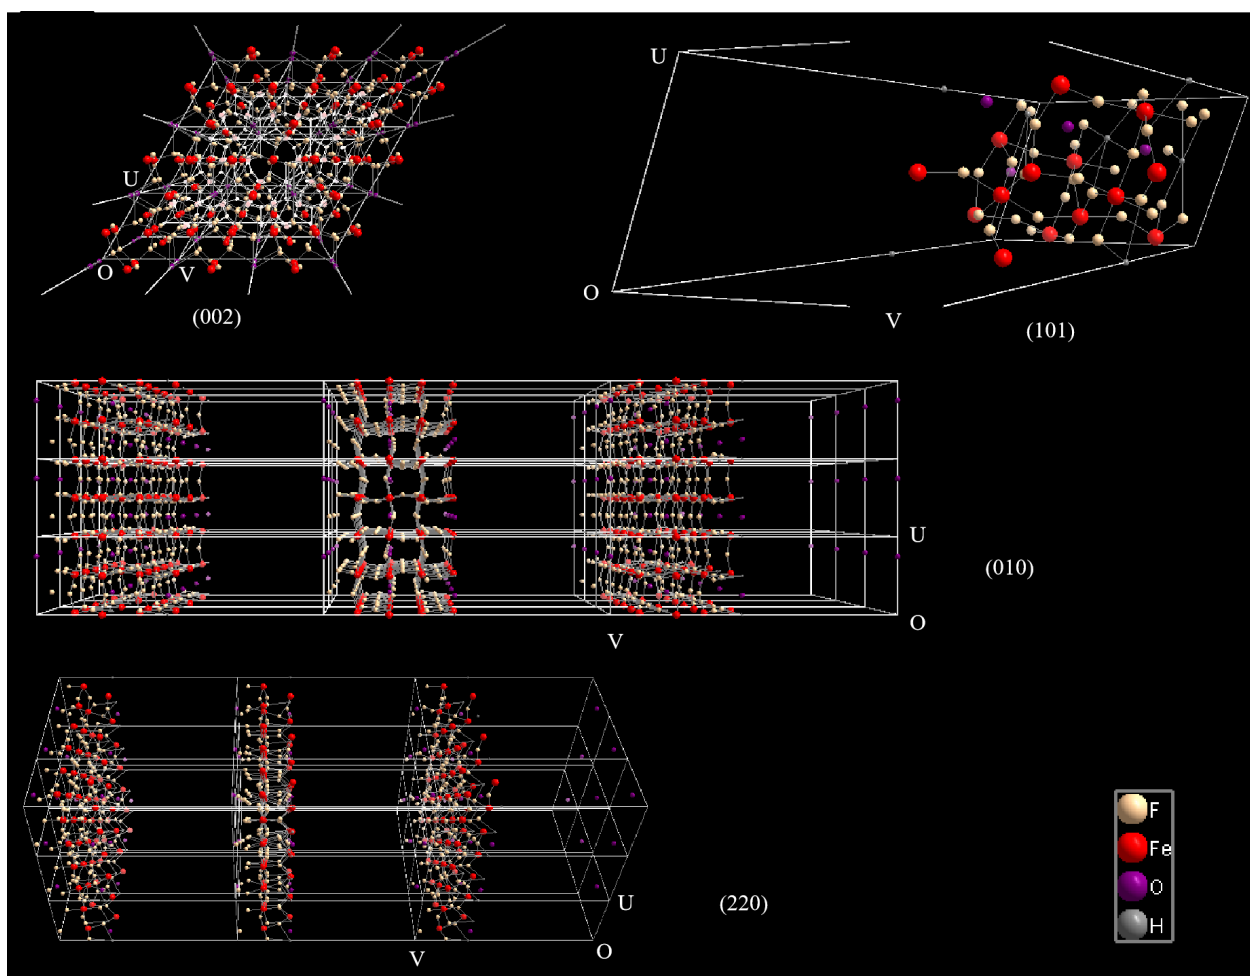

Fig. S4 Crystal structures of some low-index planes of  $\text{FeF}_3 \cdot 0.33\text{H}_2\text{O}$ .
